# Supplementary material for: Highly selective conversion of CO2 to para-xylene over tandem catalysts
Source: Royal Society of Chemistry journal article supplement (doi:10.1039/d3cc01259j), 2023-01-01
Supplement: d3cc01259j1.pdf [file d3cc01259j1.pdf]

## Supporting information for

# Highly selective conversion of CO<sub>2</sub> to *para*-xylene over tandem catalysts

Yuanzhi Qu,<sup>ab</sup> Zelong Li,<sup>c</sup> Hanwen Hu,<sup>ab</sup> Siyu Chen,<sup>ab</sup> Jijie Wang\*<sup>a</sup> and Can Li\*<sup>ab</sup>

2023.03

<sup>a</sup> State Key Laboratory of Catalysis, Dalian Institute of Chemical Physics, Chinese Academy of Sciences, Dalian 116023, China. E-mail: jjwang@dicp.ac.cn, canli@dicp.ac.cn

<sup>b</sup> University of Chinese Academy of Sciences, Beijing 101408, China

<sup>c</sup> Key Laboratory of Advanced Catalysis, Gansu Province, State Key Laboratory of Applied Organic Chemistry, College of Chemistry and Chemical Engineering, Lanzhou University, Lanzhou, Gansu 730000, China

## Catalyst preparation

The 20% ZnZrO catalyst was prepared by the co-precipitation method. 298.2 g  $\text{Zn}(\text{NO}_3)_2 \cdot 6\text{H}_2\text{O}$ , 1720.0 g  $\text{Zr}(\text{NO}_3)_4 \cdot 5\text{H}_2\text{O}$ , and 8 L deionized water were added to the reaction kettle, and the temperature was increased to 70°C while stirring. The prepared solution containing 865.8 g  $(\text{NH}_4)_2\text{CO}_3$  and 3 L deionized water was added by a peristaltic pump at a rate of 15-20 mL/min to the Zn, Zr nitrate aqueous solution with stirring during the process. After the addition of  $(\text{NH}_4)_2\text{CO}_3$ , the mixed solution continued to be aged at 70°C with constant stirring for 4 h. The sample was cooled to room temperature and then filtered and washed thoroughly with deionized water. The washed sample was dried at 110°C and then calcinated at 500°C in static air for 4h, with a calcination temperature increase rate of 5°C/min.

ZSM-5 use a commercial catalyst with a Si/Al ratio of 27. nT-ZSM-5 was prepared by silylation reaction. Raw zeolite, tetraethyl orthosilicate (TEOS), and hexane were mixed in the ratio of 1 g: 2.2 mL: 10 mL, and then the mixture was stirred at room temperature for 4 h. After stirring, the samples were filtered without washing. The filtered samples were dried at 110°C and then calcinated at 500°C in static air for 4h, with a calcination temperature increase rate of 5°C/min. Mg-modified 3T-ZSM-5 was prepared using the impregnation method. 0.053, 0.105, and 0.211 g of  $\text{Mg}(\text{NO}_3)_2 \cdot 6\text{H}_2\text{O}$  were mixed with 2 mL of deionized water and 1 g of 3T-ZSM-5 uniformly by grinding and ultrasonication, respectively. The sample was then dried at 110°C and then calcinated at 500°C in static air for 4h, with a calcination temperature increase rate of 5°C/min. The samples were 0.5 wt% Mg-3T-ZSM-5, 1 wt% Mg-3T-ZSM-5 and 2 wt% Mg-3T-ZSM-5, respectively.

The modified zeolites in the experiment to investigate the effect of modified elements on the catalytic performance of zeolites were prepared by impregnation on zeolites with a Si/Al ratio of 40.  $\text{Zn}(\text{NO}_3)_2 \cdot 6\text{H}_2\text{O}$ ,  $\text{Mg}(\text{NO}_3)_2 \cdot 6\text{H}_2\text{O}$ ,  $\text{H}_3\text{PO}_4$  (85%), or  $\text{Co}(\text{NO}_3)_2 \cdot 6\text{H}_2\text{O}$  were dissolved in an appropriate amount of deionized water and then ZSM-5 was added. The sample was stirred at 80°C for 3 h, dried at 110°C, warmed at 10°C/min, and calcinated at 550°C for 4 h. The loading of Zn, Mg, P or Co were 1 , 3 and 5 wt%, respectively.

## Catalyst evaluation

The CO<sub>2</sub> hydrogenation to aromatics reaction was carried out in a tubular fixed bed continuous flow reactor and the catalyst activity was tested by gas chromatography attached to the fixed bed. Before activity testing, all catalysts were sieved into 40-80 mesh particles by grinding, mixing, compacting, and crushing. The reactions were carried out at 1.0~3.0 MPa, 300~360°C, V(H<sub>2</sub>)/V(CO<sub>2</sub>)/V(Ar) = 72/24/4, m(ZZO): m(ZSM-5) = 1:1~3:1, and GHSV = 2400 ~ 7200 mL g<sup>-1</sup> h<sup>-1</sup>. When there is no special indication, the mass ratio of ZZO to ZSM-5 is 2:1. The reacted gases were held at 180°C and analyzed directly in a gas chromatograph (Agilent GC-7890B). CO<sub>2</sub>, CO, and Ar were separated by a TDX-01 packed column and analyzed by a TCD detector. Hydrocarbon species were separated by a PONA capillary column and analyzed by an FID detector.

The activity of the *m*-xylene isomerization reaction was tested using the same reactor and gas chromatography. The reaction was conducted at atmospheric pressure and a temperature of 320°C. *m*-xylene was bubbled in a bubbler cooled with an ice-water bath and carried into the reactor by Ar. The Ar carrier gas flow rate was set at 6000 mL g<sup>-1</sup> h<sup>-1</sup>.

The activity of the *p*-xylene isomerization reaction was tested using the same reactor and gas chromatography. The reaction was carried out under the following conditions: pressure of 0.1~1.0 MPa, temperature of 320°C, and Ar or CO<sub>2</sub> and H<sub>2</sub> mixture as the carrier gas with a GHSV of 14400~24000 mL g<sup>-1</sup> h<sup>-1</sup>. *p*-Xylene was bubbled at room temperature in a bubbler using Ar or CO<sub>2</sub> and H<sub>2</sub> mixture as the carrier gas and then carried into the reactor for the reaction.

The CO<sub>2</sub> conversion (denoted as X(CO<sub>2</sub>)), the carbon-based selectivity of the hydrocarbon species (denoted as S(product)), the proportion of *p*-xylene in xylene (denoted as P(PX)), and the conversion of *m*-xylene and *p*-xylene (denoted as X(PX) and X(MX)) were calculated using the normalization method. The calculation equations are as follows.

$$X(\text{CO}_2) = \frac{f_{\text{CO}}A_{\text{CO}} + i \sum n f_{\text{C}_n\text{H}_m} A_{\text{C}_n\text{H}_m}}{f_{\text{CO}_2}A_{\text{CO}_2} + f_{\text{CO}}A_{\text{CO}} + i \sum n f_{\text{C}_n\text{H}_m} A_{\text{C}_n\text{H}_m}} \times 100\%$$

$f$ : relative mole correction factor

$A$ : peak area on chromatographic spectra

$$i = \frac{f_{\text{CH}_4\text{-TCD}} A_{\text{CH}_4\text{-TCD}}}{f_{\text{CH}_4\text{-FID}} A_{\text{CH}_4\text{-FID}}}$$

$i$ : internal normalization conversion coefficient

$$S(\text{C}_n\text{H}_m) = \frac{n f_{\text{C}_n\text{H}_m} A_{\text{C}_n\text{H}_m}}{\sum n f_{\text{C}_n\text{H}_m} A_{\text{C}_n\text{H}_m}} \times 100\%$$

$$S(\text{CO}) = \frac{f_{\text{CO}} A_{\text{CO}}}{f_{\text{CO}} A_{\text{CO}} + i \sum n f_{\text{C}_n\text{H}_m} A_{\text{C}_n\text{H}_m}} \times 100\%$$

$$P(\text{PX}) = \frac{f_{\text{p-xylene}} A_{\text{p-xylene}}}{f_{\text{p-xylene}} A_{\text{p-xylene}} + f_{\text{m-xylene}} A_{\text{m-xylene}} + f_{\text{o-xylene}} A_{\text{o-xylene}}} \times 100\%$$

$$X(\text{PX}) = \frac{\sum f_{\text{C}_n\text{H}_m} A_{\text{C}_n\text{H}_m} - f_{\text{p-xylene}} A_{\text{p-xylene}}}{\sum f_{\text{C}_n\text{H}_m} A_{\text{C}_n\text{H}_m}} \times 100\%$$

$$X(\text{MX}) = \frac{\sum f_{\text{C}_n\text{H}_m} A_{\text{C}_n\text{H}_m} - f_{\text{m-xylene}} A_{\text{m-xylene}}}{\sum f_{\text{C}_n\text{H}_m} A_{\text{C}_n\text{H}_m}} \times 100\%$$

## Catalyst characterization

The powder X-ray diffraction was performed to analyze the crystal structure of the samples on a Rigaku Smartlab diffractometer. Diffractometer with  $\text{CuK}\alpha$  radiation source worked at 40kV and 200 mA at room temperature. The scan rate was  $10^\circ/\text{min}$ .

Scanning electron microscopy was used to characterize the morphology of the catalyst on a JSM-7800F microscope.

Ar adsorption was performed on Autosorb iQ (Quantachrome Instruments) at  $-186^\circ\text{C}$  to measure the pore size distribution of the catalysts. The NL-DFT method was used to determine the pore volume.

The acid amount and strength of zeolites were tested by temperature-programmed desorption of ammonia ( $\text{NH}_3$ -TPD) on a chemisorption analyzer (Micromeritics Autochem II 2920) coupled with a HIDEN mass spectrometer. Typically, 100 mg zeolite was pretreated at  $450^\circ\text{C}$  for 120 minutes with a heating rate of  $10^\circ\text{C}/\text{min}$  and a pretreatment gas of helium gas flow rate of 30 mL/min. The catalyst was then cooled to  $100^\circ\text{C}$  and the

gas was switched to 10 V% NH<sub>3</sub>/He at 30 mL/min to adsorb NH<sub>3</sub> for 30 min. After the NH<sub>3</sub> adsorption was completed, the gas was switched to He for 60 min at a flow rate of 30 mL/min to remove the physically adsorbed NH<sub>3</sub>. After the desorption was completed, the zeolite was heated to 800 °C at a rate of 10 °C/min, and the signal was recorded by mass spectrometry.

The external surface acid amount of the zeolite was determined by 2,6-di-tert-butylpyridine (DTBPy) adsorbed Fourier transform infrared spectroscopy. IR was performed using a TENSOR27 spectrometer. The samples were pressed into a wafer and then processed at 450 °C (10 °C/min ramp-up) for 1 h at 10<sup>-2</sup> Pa. The samples were then cooled to 150 °C and allowed to adsorb DTBPy for 15 min. The samples were then processed under a high vacuum for 1 h to remove the physically adsorbed DTBPy and the samples were scanned for IR spectra.

The solid-state magic angle spinning nuclear magnetic resonance (MAS NMR) spectra were measured on a Bruker AVANCE NEO 400 MHz equipped with a 4.0 mm probe. For <sup>29</sup>Si MAS NMR, the spinning rate is 8 kHz with a recycle delay of 5 s. For <sup>1</sup>H MAS NMR, the spinning rate is 14 kHz.

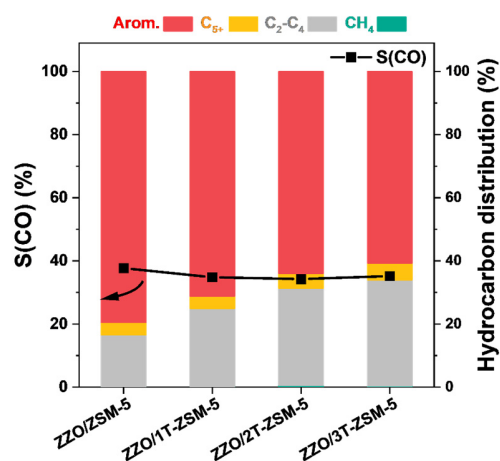

**Figure S1.** CO selectivity and hydrocarbon distribution of CO<sub>2</sub> hydrogenation on ZZO/nT-ZSM-5 corresponding to Figure 1a in the main text. Reaction conditions: 320°C, 2.0 MPa, CO<sub>2</sub>: H<sub>2</sub> of 1:3, GHSV of 4800 mL g<sup>-1</sup> h<sup>-1</sup>.

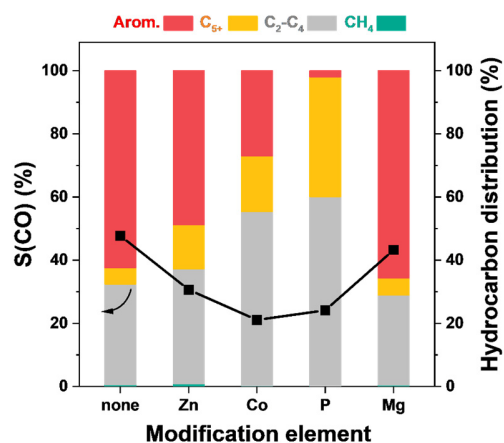

**Figure S2.** CO selectivity and hydrocarbon distribution of CO<sub>2</sub> hydrogenation on ZZO/Modified-ZSM-5 corresponding to Figure 1b in the main text. Reaction conditions: 320°C, 4.0 MPa, CO<sub>2</sub>: H<sub>2</sub> of 1:3, GHSV of 7200 mL g<sup>-1</sup> h<sup>-1</sup>. The contents of modified elements are 5 wt% Zn, 3 wt% Co, 5 wt% P and 3 wt% Mg, respectively.

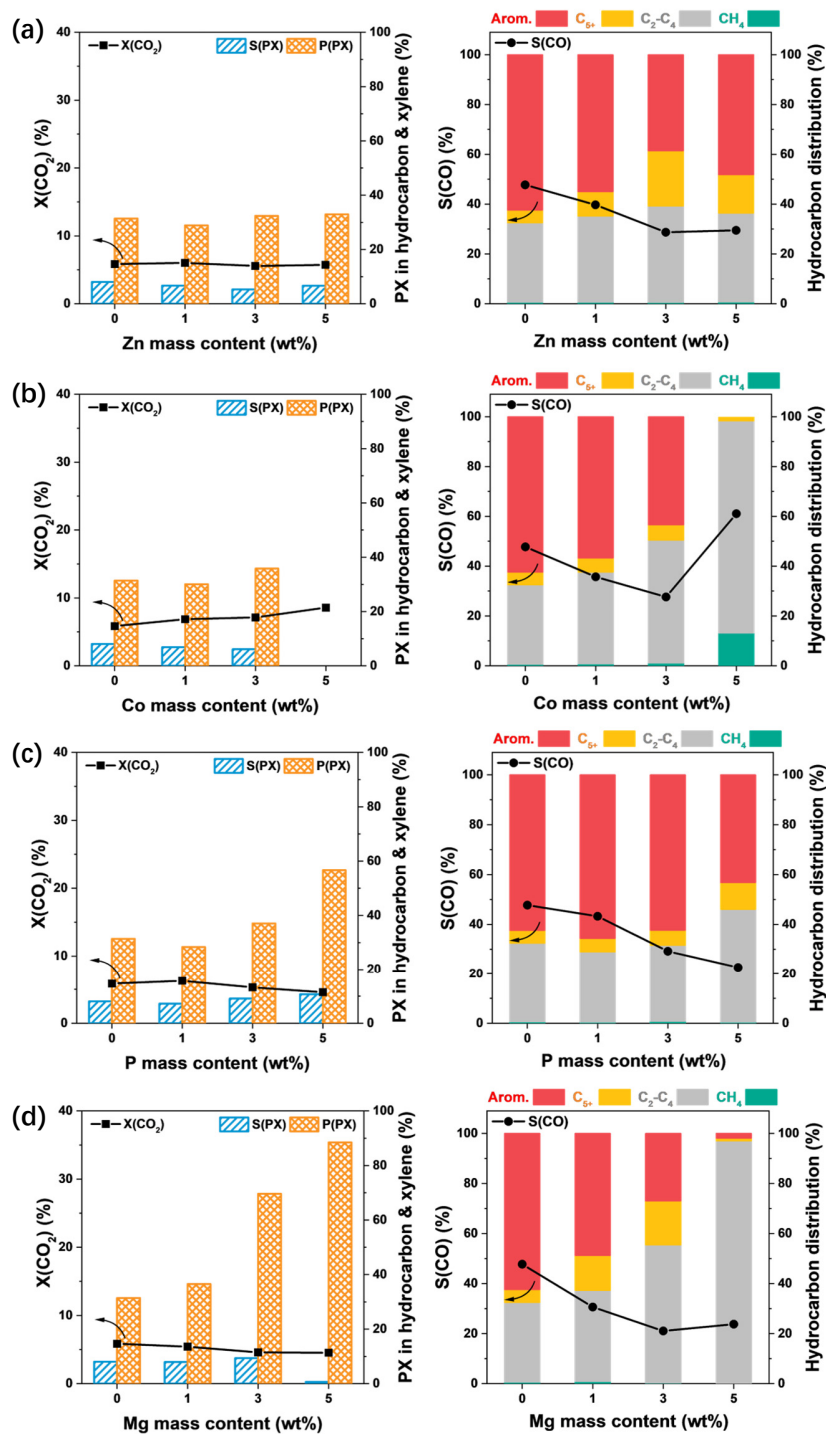

**Figure S3.** CO<sub>2</sub> conversion, PX selectivity, CO selectivity, and hydrocarbon distribution of CO<sub>2</sub> hydrogenation on ZZO/Modified-ZSM-5 with different element content, (a) Zn, (b) Co, (c) P and (d) Mg. Reaction conditions: 320°C, 4.0 MPa, CO<sub>2</sub>: H<sub>2</sub> of 1:3, GHSV of 7200 mL g<sup>-1</sup> h<sup>-1</sup>.

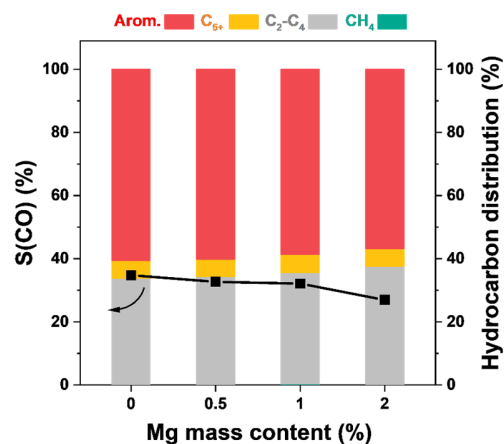

**Figure S4.** CO selectivity and hydrocarbon distribution of CO<sub>2</sub> hydrogenation on ZZO/x%Mg-nT-ZSM-5 corresponding to Figure 1c in the main text. Reaction conditions: 320°C, 2.0 MPa, CO<sub>2</sub>: H<sub>2</sub> of 1:3, 4800 mL g<sup>-1</sup> h<sup>-1</sup>.

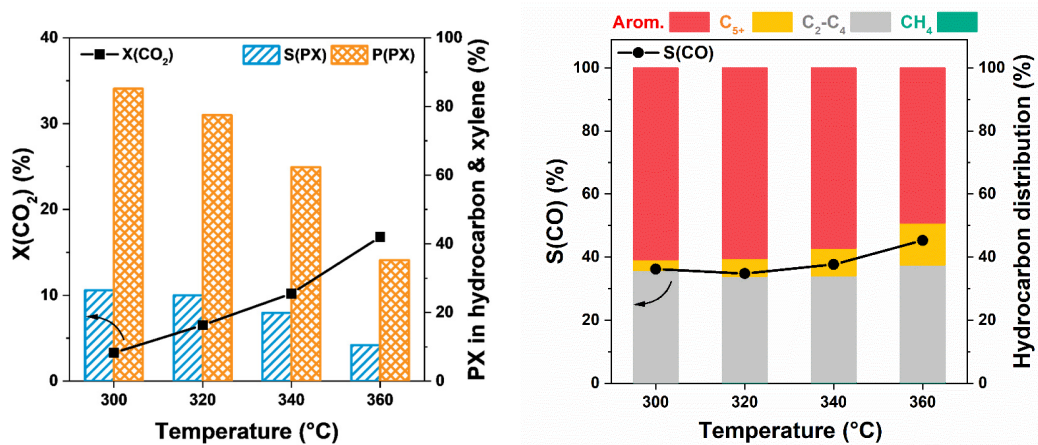

**Figure S5.** CO<sub>2</sub> conversion, PX selectivity, CO selectivity, and hydrocarbon distribution of CO<sub>2</sub> hydrogenation on ZZO/3T-ZSM-5 with different temperature. Reaction conditions: 2.0 MPa, CO<sub>2</sub>: H<sub>2</sub> of 1:3, GHSV of 4800 mL g<sup>-1</sup> h<sup>-1</sup>.



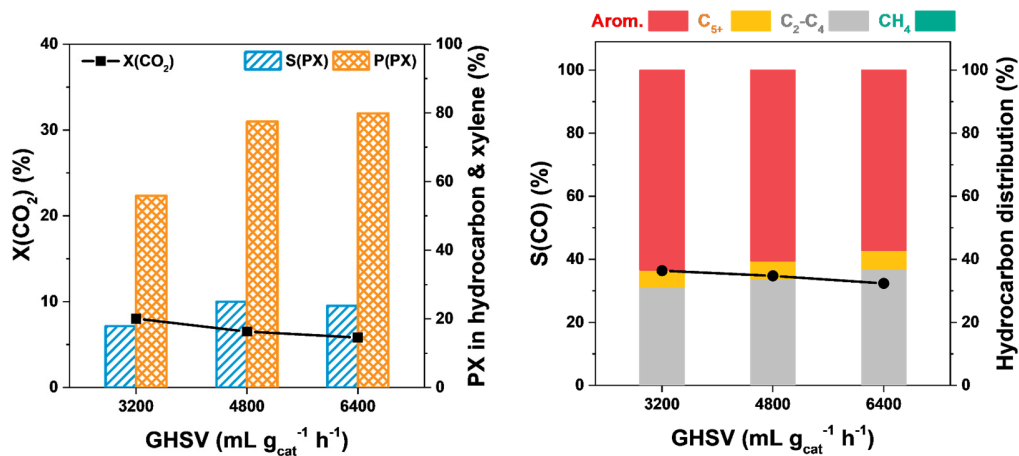

**Figure S6.** CO<sub>2</sub> conversion, PX selectivity, CO selectivity, and hydrocarbon distribution of CO<sub>2</sub> hydrogenation on ZZO/3T-ZSM-5 with different GHSV. Reaction conditions: 320°C, 2.0 MPa, CO<sub>2</sub>: H<sub>2</sub> of 1:3.

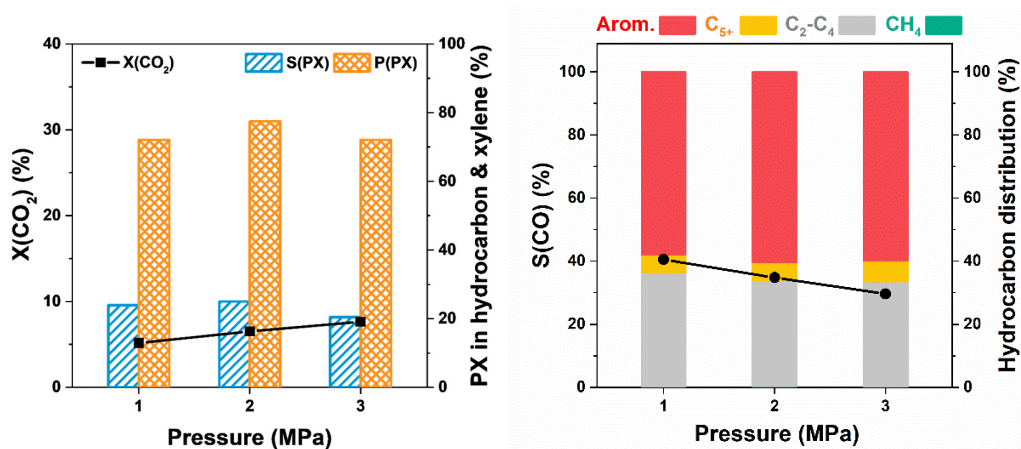

**Figure S7.** CO<sub>2</sub> conversion, PX selectivity, CO selectivity, and hydrocarbon distribution of CO<sub>2</sub> hydrogenation on ZZO/3T-ZSM-5 with different pressure. Reaction conditions: 320°C, CO<sub>2</sub>: H<sub>2</sub> of 1:3, GHSV of 4800 mL g<sup>-1</sup> h<sup>-1</sup>.

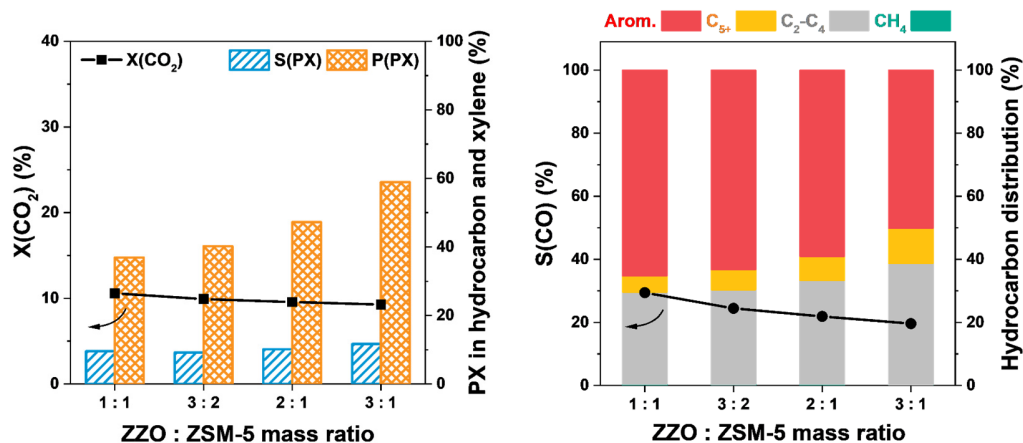

**Figure S8.** CO<sub>2</sub> conversion, PX selectivity, CO selectivity, and hydrocarbon distribution of CO<sub>2</sub> hydrogenation on ZZO/2T-ZSM-5 with different ZZO: ZSM-5 ratio. Reaction conditions: 320°C, 2.0 MPa, CO<sub>2</sub>: H<sub>2</sub> of 1:3, GHSV of 4800 mL g<sup>-1</sup> h<sup>-1</sup> (calculated by ZZO), ZSM-5 with Si/Al ratio of 40.

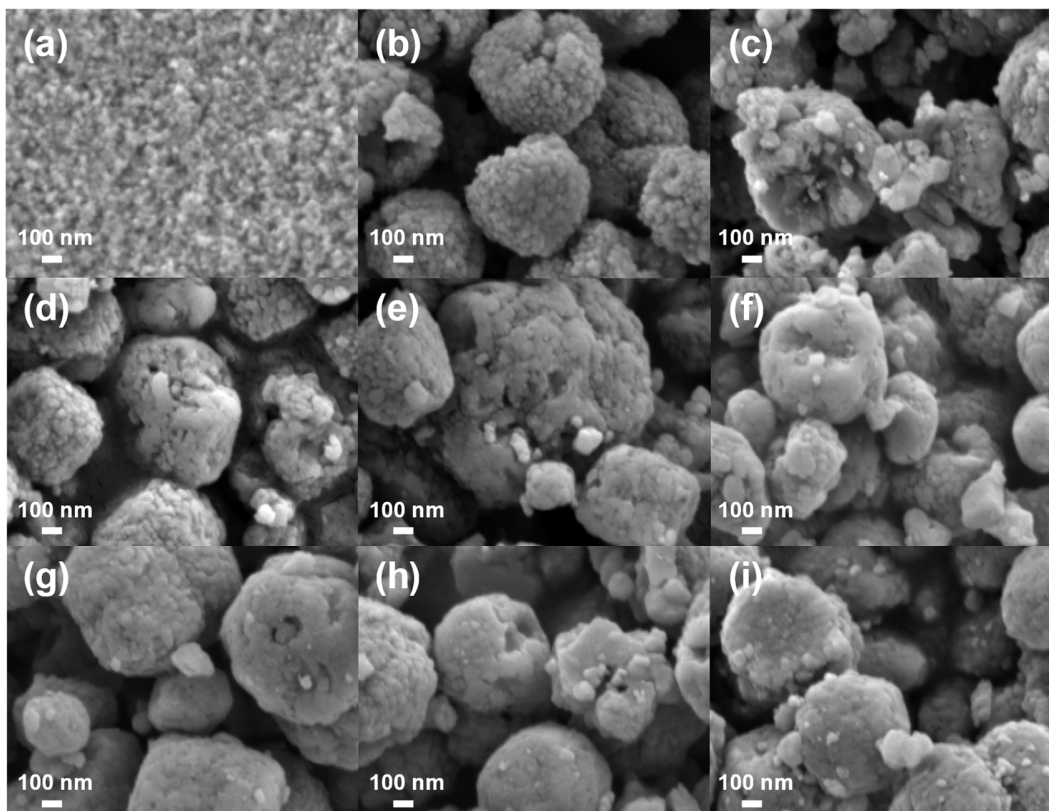

**Figure S9.** SEM images of ZnZrO (a), ZSM-5 (b), ZZO/ZSM-5 (c), 1T-ZSM-5 (d), 2T-ZSM-5 (e), 3T-ZSM-5 (f), 0.5Mg-3T-ZSM-5 (g), 1Mg-3T-ZSM-5 (h), and 2Mg-3T-ZSM-5(i).

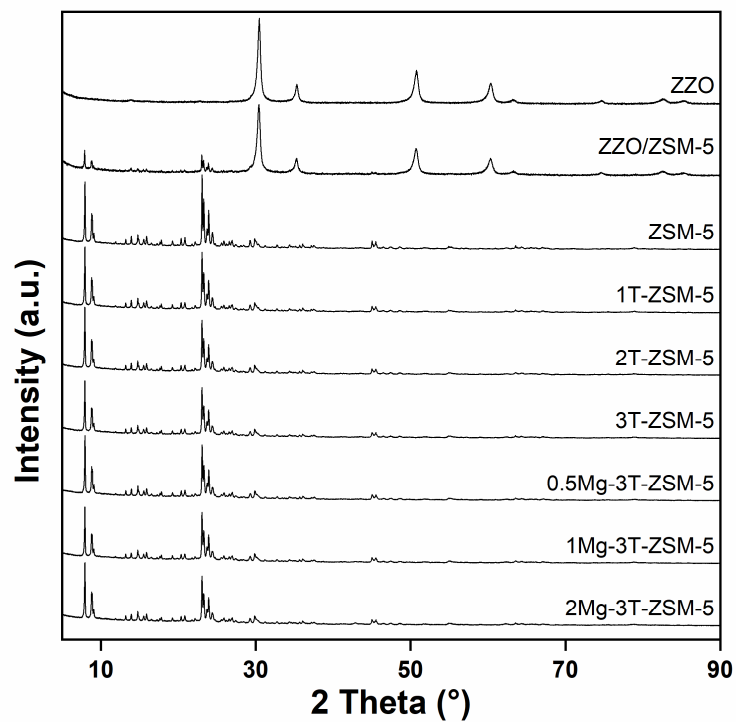

**Figure S10.** XRD patterns of ZZO, ZZO/ZSM-5, ZSM-5, nT-ZSM-5, and xMg-3T-ZSM-5.

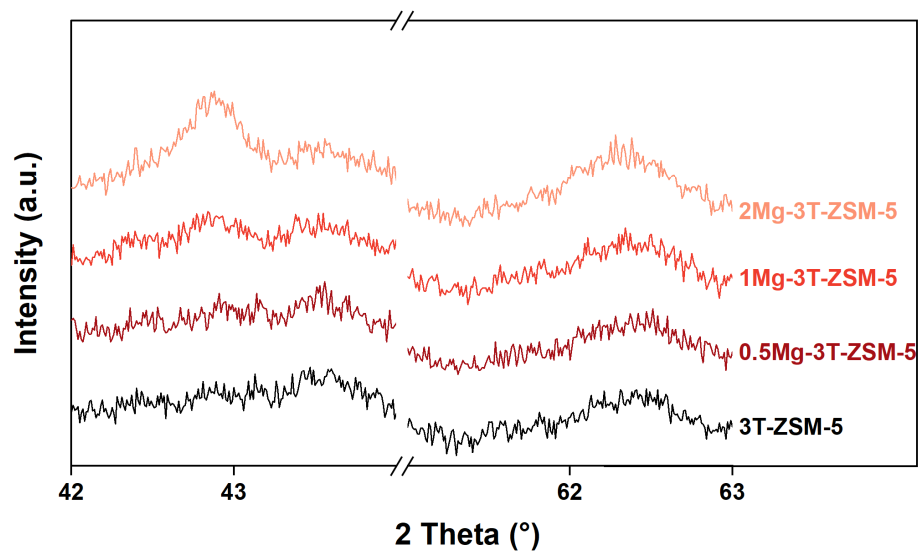

**Figure S11.** Detailed XRD patterns of 3T-ZSM-5 and Mg modified 3T-ZSM-5.

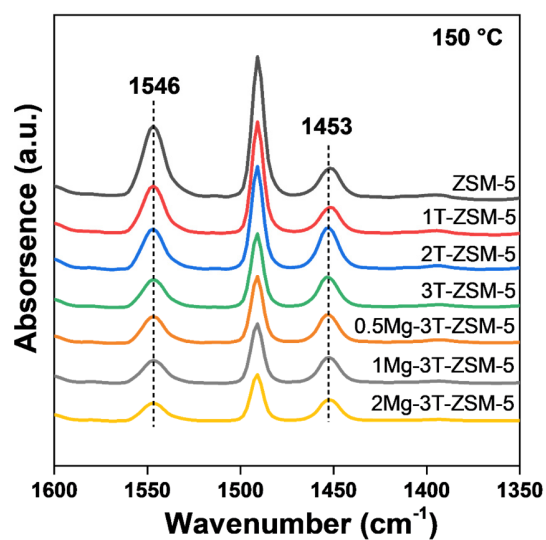

Figure S12. Pyridine FTIR of ZSM-5, nT-ZSM-5 and xMg-nT-ZSM-5.

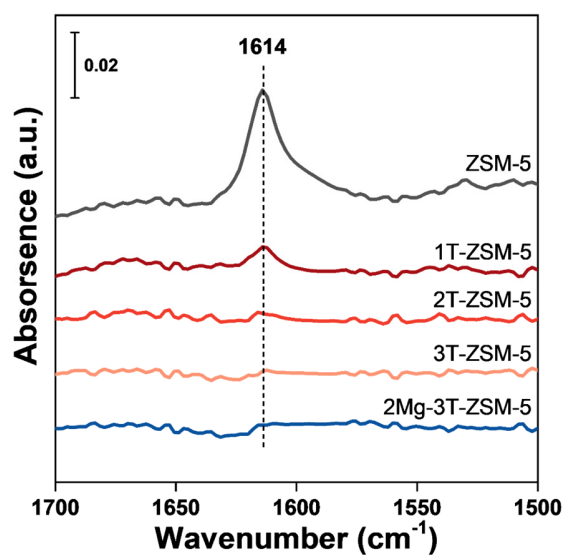

Figure S13. 2,6-di-tert-butylpyridine FTIR of ZSM-5, nT-ZSM-5, and 2Mg-3T-ZSM-5.

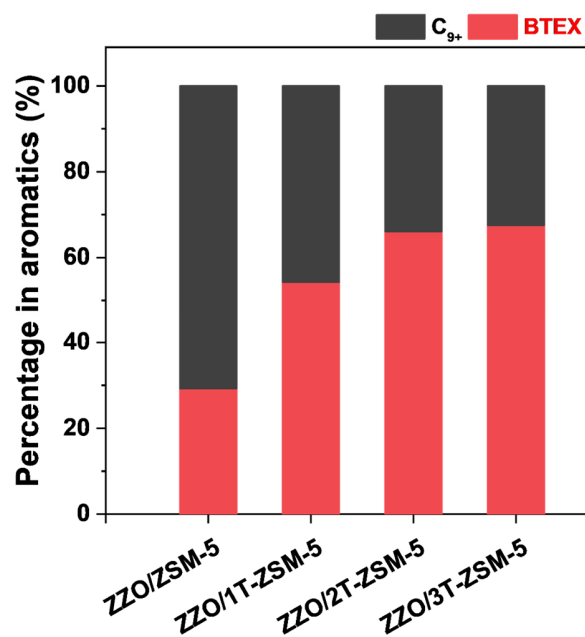

**Figure S14.** Benzene, toluene, ethylbenzene, xylene, (BTEX) and C<sub>9+</sub> aromatics percentage in all aromatics of CO<sub>2</sub> hydrogenation on ZZO/nT-ZSM-5. Reaction conditions: 320°C, 2.0 MPa, CO<sub>2</sub>: H<sub>2</sub> of 1:3, GHSV of 4800 mL g<sup>-1</sup> h<sup>-1</sup>.

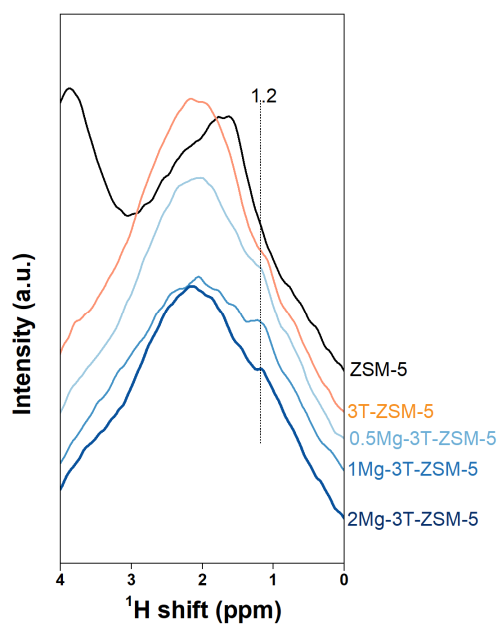

**Figure S15.** <sup>1</sup>H NMR of ZSM-5 series in detail.

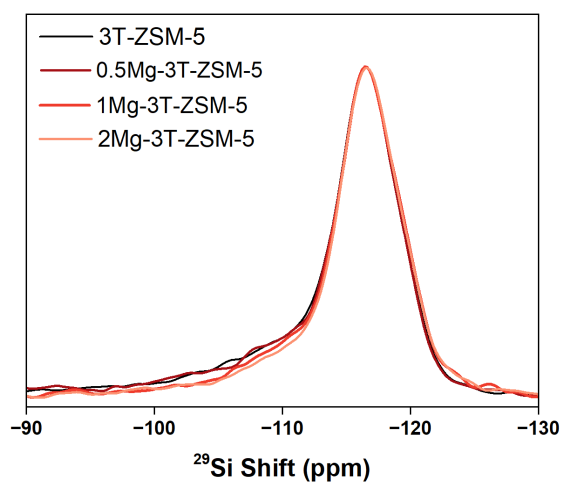

**Figure S16.**  $^{29}\text{Si}$  NMR of 3T-ZSM-5 and xMg-3T-ZSM-5 after normalization.

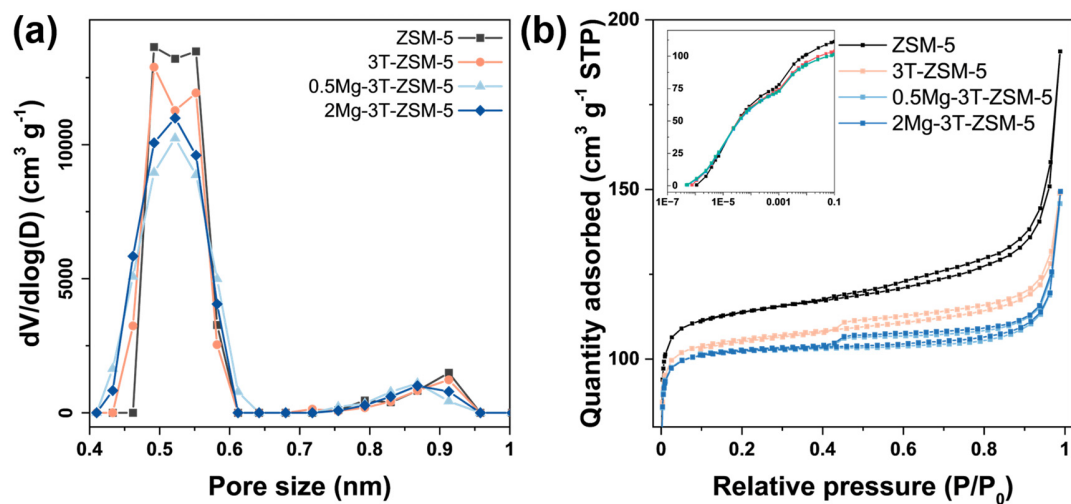

**Figure S17.** NL-DFT calculation based on Ar adsorption-desorption isotherms (a) and Ar adsorption-desorption isotherms (b) of different catalysts.

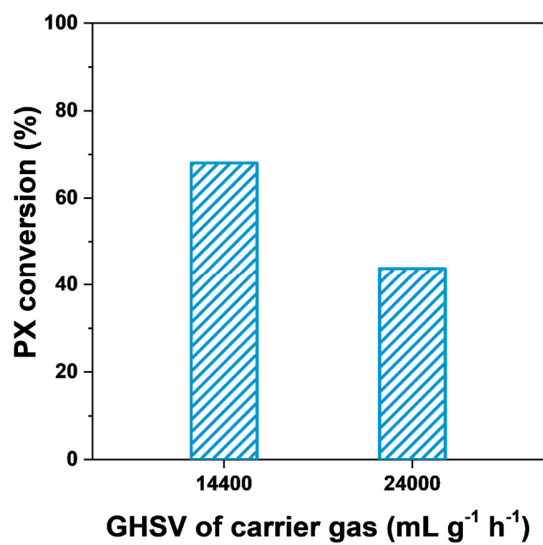

**Figure S18.** PX isomerization conversion on 3T-ZSM-5 with different GHSV. Reaction conditions: 320°C, 1.0 MPa.

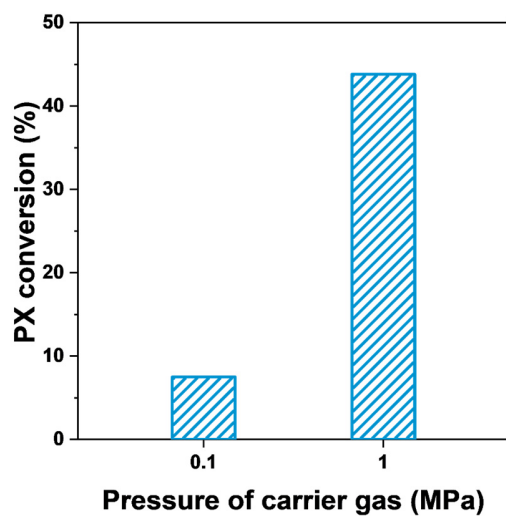

**Figure S19.** PX isomerization conversion on 3T-ZSM-5 with different GHSV. Reaction conditions: 320°C, Ar of 24000 mL g<sup>-1</sup> h<sup>-1</sup>

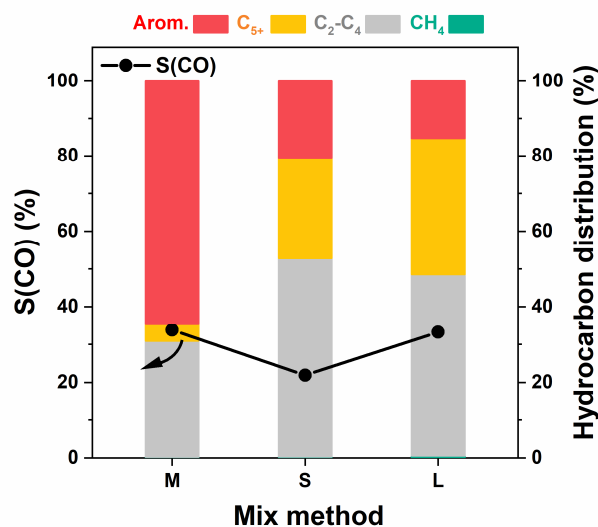

**Figure S20.** CO selectivity and hydrocarbon distribution of CO<sub>2</sub> hydrogenation on catalysts with different mixing method corresponding to Figure 3c in the main text. Reaction conditions: 320°C, 2.0 MPa, CO<sub>2</sub>: H<sub>2</sub> of 1:3, GHSV of 4800 mL g<sup>-1</sup> h<sup>-1</sup>.

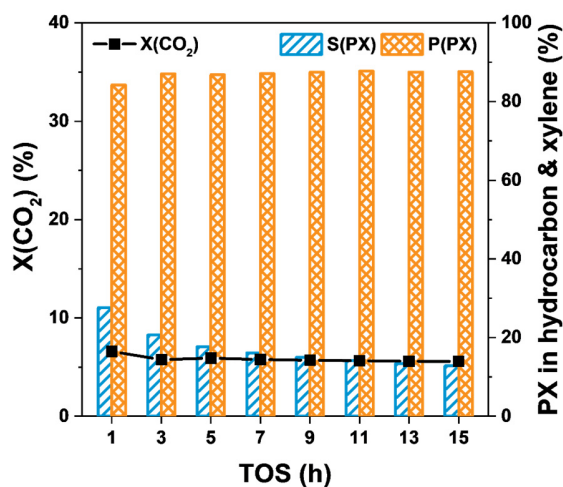

**Figure S21.** Stability test of ZZO/1%Mg-3T-ZSM-5 catalyst. Reaction condition: 320°C, 2.0 MPa, CO<sub>2</sub>: H<sub>2</sub> of 1:3, GHSV of 4800 mL g<sup>-1</sup> h<sup>-1</sup>.



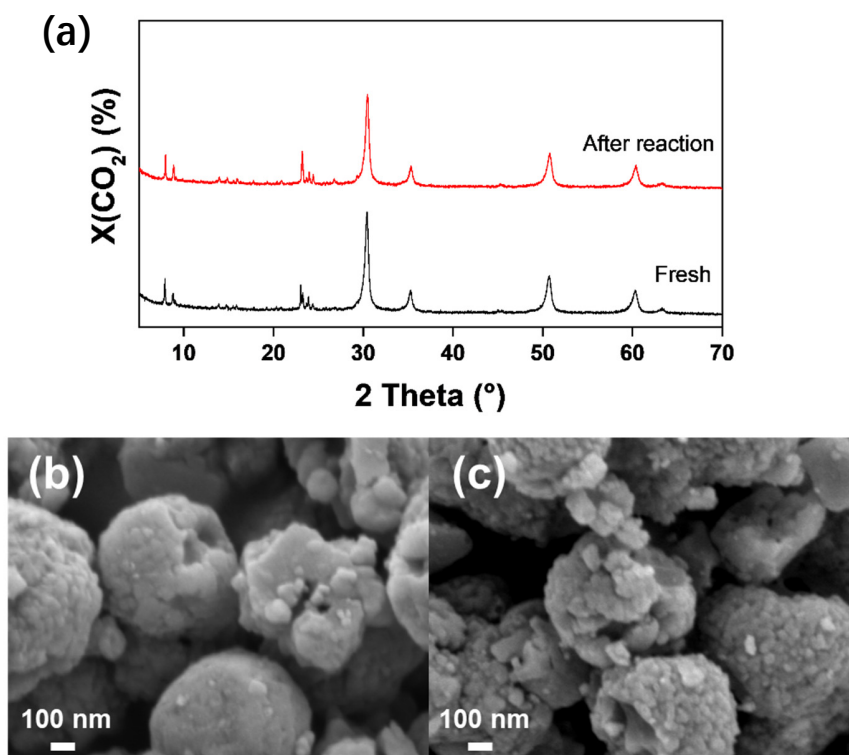

**Figure S22.** XRD patterns of fresh ZZO/3T-ZSM-5 and used ZZO/1%Mg-3T-ZSM-5 (a). SEM images of fresh 1%Mg-3T-ZSM-5 (b) and used ZZO/1%Mg-3T-ZSM-5 (c).

**Table S1.** ICP results of 3T-ZSM-5 and xMg-3T-ZSM-5

| Catalyst          | Weight (g) | Mass concentration (mg/L) |       |        | Mg mass content (%) |
|-------------------|------------|---------------------------|-------|--------|---------------------|
|                   |            | Mg                        | Al    | Si     |                     |
| 3T-ZSM-5 #1       | 0.023      | 134.8                     | 14310 | 475700 | 0.01                |
| 3T-ZSM-5 #2       | 0.0237     | 128.7                     | 13600 | 451900 | 0.01                |
| 0.5Mg-3T-ZSM-5 #1 | 0.0242     | 5804                      | 14320 | 487200 | 0.54                |
| 0.5Mg-3T-ZSM-5 #2 | 0.0266     | 5294                      | 13190 | 446000 | 0.54                |
| 1Mg-3T-ZSM-5 #1   | 0.0223     | 10340                     | 12450 | 440900 | 1.07                |
| 1Mg-3T-ZSM-5 #2   | 0.0222     | 10540                     | 12740 | 448300 | 1.07                |
| 2Mg-3T-ZSM-5 #1   | 0.0218     | 19370                     | 11960 | 422700 | 2.09                |
| 2Mg-3T-ZSM-5 #2   | 0.0263     | 20120                     | 12450 | 430900 | 2.13                |

**Table S2.** Content of Si(3Si,1Al) and Si(4Si) calculated from the <sup>29</sup>Si-NMR.

| Zeolites       | Si(3Si, 1Al) (%) | Si(4Si) (%) |
|----------------|------------------|-------------|
| 3T-ZSM-5       | 23.4             | 76.6        |
| 0.5Mg-3T-ZSM-5 | 22.2             | 77.8        |
| 1Mg-3T-ZSM-5   | 14.7             | 85.3        |
| 2Mg-3T-ZSM-5   | 14.1             | 85.9        |

**Table S3.** Pore size calculates by NL-DFT.

| Zeolites       | Pore size (nm) |
|----------------|----------------|
| ZSM-5          | 0.552          |
| 3T-ZSM-5       | 0.552          |
| 0.5Mg-3T-ZSM-5 | 0.522          |
| 2Mg-3T-ZSM-5   | 0.522          |

**Table S4.** Catalytic performance and STY of PX of ZZO/ZSM-5 series.

| ZZO/zeolites   | X(CO <sub>2</sub> ) (%) | S(CO) (%) | S(PX) (%) | P(PX) (%) | STY(PX) mg/g <sub>cat</sub> /h |
|----------------|-------------------------|-----------|-----------|-----------|--------------------------------|
| ZSM-5          | 7.6                     | 37.7      | 4.7       | 23.5      | 1.5                            |
| 1T-ZSM-5       | 7.3                     | 34.8      | 13.3      | 42.5      | 4.3                            |
| 2T-ZSM-5       | 6.7                     | 34.2      | 22.0      | 65.3      | 6.6                            |
| 3T-ZSM-5       | 7.0                     | 35.2      | 25.0      | 76.3      | 7.7                            |
| 0.5Mg-3T-ZSM-5 | 6.5                     | 32.7      | 27.0      | 81.4      | 8.1                            |
| 1Mg-3T-ZSM-5   | 6.6                     | 32.1      | 27.6      | 84.2      | 8.4                            |
| 2Mg-3T-ZSM-5   | 5.6                     | 27.0      | 27.2      | 85.7      | 7.7                            |

Reaction condition: 320 °C, 2 MPa, 4800 mL/g<sub>cat</sub>/h

**Equation S1.**

$$T_R = \frac{H}{v} = \frac{\frac{V_c}{\pi(l/2)^2}}{\frac{p_0}{p_r} \cdot \frac{V_{in}}{\pi(l/2)^2}} = \frac{p_r \cdot V_c}{p_0 \cdot V_{in}} = \frac{1}{p_0 \cdot \rho_c} \cdot \frac{p_r}{GHSV}$$

$T_R$  - Residence time

$H$  - Height of catalyst bed

$V$  - Velocity of carrier gas through the catalyst bed

$V_c$  - Volume of catalyst

$L$  - Inner diameter of the reaction tube

$p_r$  - Pressure

$p_0$  - Atmospheric pressure

$V_{in}$  - Inlet gas flow rate

$P_c$  - Density of catalyst

$GHSV$  - Gas hourly space velocity

## References

1. J. Wang, G. Li, Z. Li, C. Tang, Z. Feng, H. An, H. Liu, T. Liu and C. Li, *Sci. Adv.*, 2017, **3**, e1701290.
2. W. Tan, M. Liu, Y. Zhao, K. Hou, H. Wu, A. Zhang, H. Liu, Y. Wang, C. Song and X. Guo, *Microporous and Mesoporous Materials*, 2014, **196**, 18–30.
3. J. Zhang, X. Zhu, S. Zhang, M. Cheng, M. Yu, G. Wang and C. Li, *Catal. Sci. Technol.*, 2019, **9**, 316–326.
4. R. W. Weber, K. P. Möller and C. T. O'Connor, *Microporous and Mesoporous Materials*, 2000, **35–36**, 533–543.
